# Supplementary material for: Mylk3 null C57BL/6N mice develop cardiomyopathy, whereas Nnt null C57BL/6J mice do not
Source: Life Sci Alliance. 2020 Mar 25;3(4):e201900593. doi: 10.26508/lsa.201900593 (PMC7103425; doi:10.26508/lsa.201900593)
Supplement: Supplementary file 4 [file LSA-2019-00593_TableS4.xlsx]

## Sheet: Sheet1
Table S4. Expression values of Nnt-dependent gene list generated by CuffDiff TopHat pipeline. Mean and SD values for each gene identified by CuffDiff TopHat pipeline as significantly different between both B6N and B6J and between B6J and B6J-Nnt.
	C57BL/6N		C57BL/6J		C57BL/6J-Nnt
Gene	Mean	SD	Mean	SD	Mean	SD
Abi3bp	238.2	94.96	169.6	33.72	264.8	113.55
Aqp4	178.2	79.18	100.6	33.92	195.4	113.69
Aqp8	120.2	52.78	233	108.36	116.4	58.88
Atf3	137.6	44.28	566.4	520.89	189.8	95.6
B2m	10080.8	7673.73	5579.2	1861.92	9360.2	5475.96
Bst2	813	541.17	551.2	149.72	788.6	496.86
Btg2	1345	485.43	2508	1607.58	1352.2	462.6
Cacna1g	829.2	294.61	457.8	72.69	660.2	154.39
Casq1	446.6	248.72	130.6	71.47	254.59	49.98
Ccl2	53.2	26.64	116	98.14	61.4	24.38
Ccl7	52.4	32.75	134.4	111.64	55.4	24.57
Cntn2	459.06	168.7	233.57	50.35	483.46	143.41
Comp	375.4	283.55	187.4	82.09	404.2	272.57
Cpxm2	1625.8	625.58	2899.8	1102.94	1838.6	835.9
Cyr61	1360.4	575.71	2789.4	1292.09	1685	744.18
Ddit4	893	485.55	1313.8	553.83	821	336.46
Dnajb1	549.87	236.36	1410.92	1120.94	581.92	161.58
Egr1	1342.6	1387.75	3574.8	2656.67	1131.4	670.83
Egr2	53	74.51	353.8	340.28	41.6	19.2
Egr3	84	91.78	386.8	410.45	79.4	43.66
Errfi1	606	237.74	2232.6	2158.35	707	241.91
F5	103.4	71.13	48.2	26.32	231.8	222.48
Fos	158.2	127.97	724.6	841.93	245.2	177.64
Fosb	15.2	8.35	115.4	106.61	30.4	19.05
Fosl2	894.61	344.11	1923.44	1174.09	1078.89	288.54
Gadd45g	301	126.92	227	62.57	345.2	79.6
Gbp3	1025.05	1128.59	398.8	125.3	627.31	353.27
Gbp4	1248.53	1406.75	404.27	125.82	799.45	396.96
Gp5	54.8	36.69	35.2	18.29	159.8	156.79
H2-Aa	1960.8	1069.59	1421.8	388.37	2229	848.34
H2-Ab1	1570.2	903.22	1142.8	380.68	1869.4	872.67
H2-D1	9754.79	5538.46	6564.89	2016.7	9738.29	4861.9
H2-DMb1	171.71	101.76	112.99	32.87	194.92	84.99
H2-Eb1	1807.6	964.53	1316	382.83	2104.6	955.19
H2-K1	9738.68	7524.48	5175.8	1613.81	8394.2	4342.92
H2-Q4	2530.02	1415.32	1443.93	578.81	2289.69	1225.81
H2-Q5	217.95	115.46	123.84	68.05	201.36	112.68
H2-T23	1473.77	902.95	923.49	221.94	1331.94	609.16
Hspa1a	100.4	55.59	2238.39	2888.68	154.14	82.08
Hspa1b	86.42	44.81	2221.7	2854.23	123.47	70.41
Hsph1	1301.6	406.25	2634.4	1873.93	1291.2	162.86
Irf7	695.8	661.54	355.4	155.89	573.2	394.25
Irs2	299.6	124.04	753.4	465.5	308.4	123.75
Itga2b	352.6	230.21	277	158.38	1086.4	1041.77
Junb	685.2	518.24	1393	861.63	617.6	242.21
Nlrc5	442.6	467.6	159.6	67.06	288.4	151.6
Nnt	33735.3	5703.66	17579.6	2731.67	87541.2	38313.1
Nr4a1	720	353.86	2839.6	2507.11	1015.6	704.13
Nr4a2	63.07	24.95	186.41	127.56	77.56	20.86
Nr4a3	91.89	42.77	594.6	572.17	143.63	26.93
Oasl2	428.14	246.94	281.42	88.62	448.18	270.15
Ppbp	363.8	241.64	249.8	140.3	1038.8	1120.95
Psmb8	831.8	696.57	453	145.64	691.4	391.59
Psmb9	481.2	493.26	231.43	94.02	363.87	201.35
Scd4	541.82	217.44	330.85	133.28	490.91	235.53
Sik1	1313.89	542.02	2624.54	1691.14	1447.92	501.66
Thbs1	493.26	182.21	1733.71	2175.72	779.51	419.91
Tmem144	1055	310.28	1445.4	405.41	1098.8	512.37
Tubb1	160.8	102.11	91.2	53.16	374.6	339.64
Uba7	1339.17	893.36	742.51	258.84	1086.71	537.09
Zfp36	762.45	273.32	1139.23	459.96	721.65	185.98
